# Supplementary material for: La Unión Europea: el derecho a la libre circulación de los ciudadanos y la escasa movilidad de la Ciudadanía Europea
Source: Oxford University Press journal article supplement (doi:10.1534/genetics.115.178533), 2012-01-01
Supplement: figures1.pdf [file figures1.pdf]

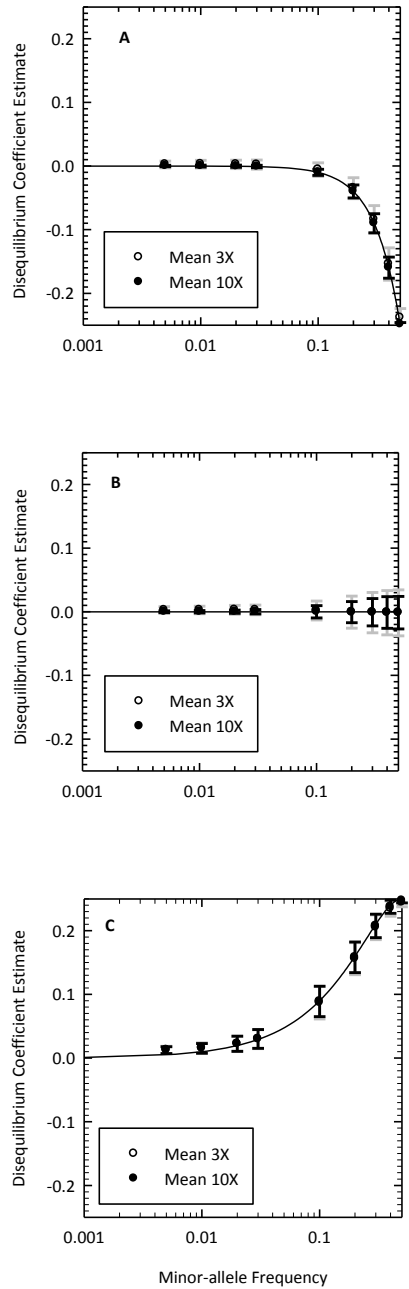

**Figure S1** ML estimate of the disequilibrium coefficient. The ML estimate of the disequilibrium coefficient  $D_A$  as a function of the minor-allele frequency is shown when  $D_A$  is A) minimized, B) equal to zero (Hardy-Weinberg equilibrium), or C) maximized. The results are conditioned on significant polymorphism at the 5% level. The mean and standard deviation of the estimated  $D_A$  are shown by the point and bar (gray for mean 3x and black for mean 10x), respectively. A, C) The curve represents the ideal situation where the ML estimate is equal to the true value. B) The true value of  $D_A$  is zero (shown by the line). Number of sampled individuals  $N = 100$ , error rate  $\epsilon = 0.01$ . A total of 10,000 simulation replications were run for each set of parameter values.
