# Supplementary material for: La Unión Europea: el derecho a la libre circulación de los ciudadanos y la escasa movilidad de la Ciudadanía Europea
Source: Oxford University Press journal article supplement (doi:10.1534/genetics.115.178533), 2012-01-01
Supplement: figures4.pdf [file figures4.pdf]

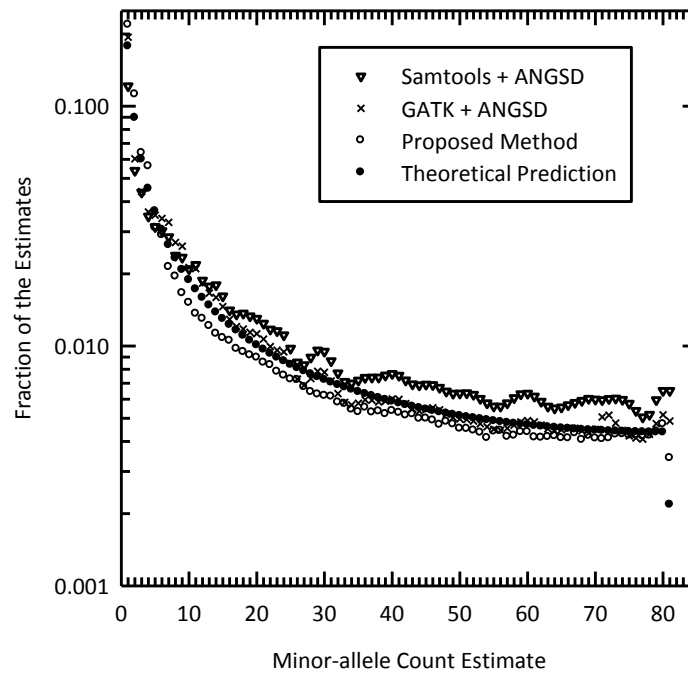

**Figure S4** Comparison of site-frequency spectra on human chromosome 6 estimated by different methods. The site-frequency spectrum estimated using the method by Nielsen *et al.* (2012) (ANGSD) and the Samtools or GATK genotype likelihood model is compared to that estimated using the proposed method. The theoretical prediction is in a population with constant size, and is given by  $[1/j + 1/(162-j)]/[\sum_{k=1}^{161} 1/k]$  for  $1 \leq j < 81$  and  $(1/j)/[\sum_{k=1}^{161} 1/k]$  for  $j = 81$ , where  $j$  is the minor-allele count (Ewens 2004).
