# Supplementary material for: La Unión Europea: el derecho a la libre circulación de los ciudadanos y la escasa movilidad de la Ciudadanía Europea
Source: Oxford University Press journal article supplement (doi:10.1534/genetics.115.178533), 2012-01-01
Supplement: figures6.pdf [file figures6.pdf]

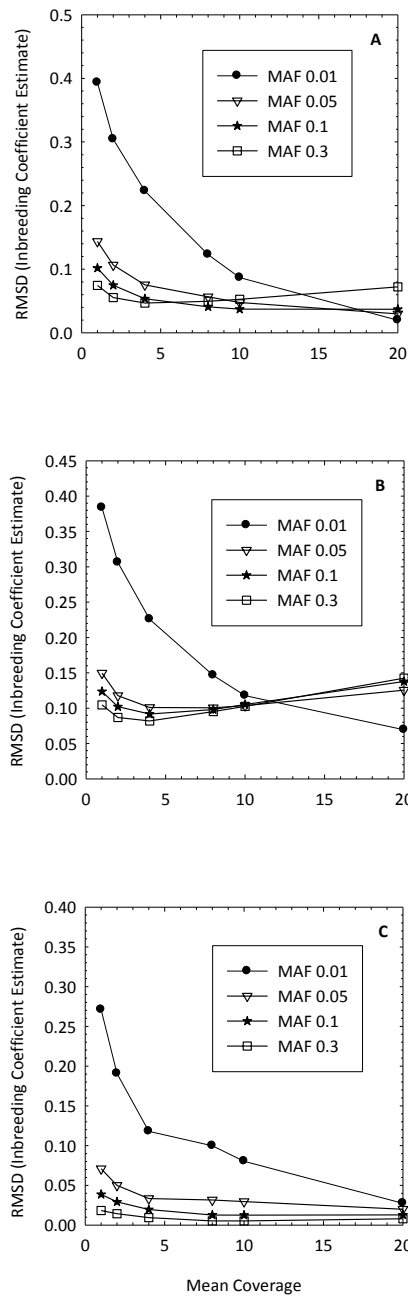

**Figure S6** Root mean square deviation of the inbreeding coefficient estimates, as a function of the mean depth of coverage, estimated from a fixed number of total sequence reads. The product of the mean depth of coverage  $\mu$  and number of sampled individuals  $N$  is fixed at 1,000 such that a two-fold increase in  $\mu$  resulted in a two-fold decrease in  $N$ . The root mean square deviation (RMSD) when the inbreeding coefficient is A) minimized, B) equal to zero (Hardy-Weinberg equilibrium), or C) maximized is shown. Results are conditioned on significant polymorphism at the 5% level. The error rate  $\epsilon = 0.01$ . A total of 10,000 simulation replications were run for each set of parameter values.
