# Supplementary figures and images for: La Unión Europea: el derecho a la libre circulación de los ciudadanos y la escasa movilidad de la Ciudadanía Europea
Source: Oxford University Press journal article supplement (doi:10.1534/genetics.115.178533), 2012-01-01

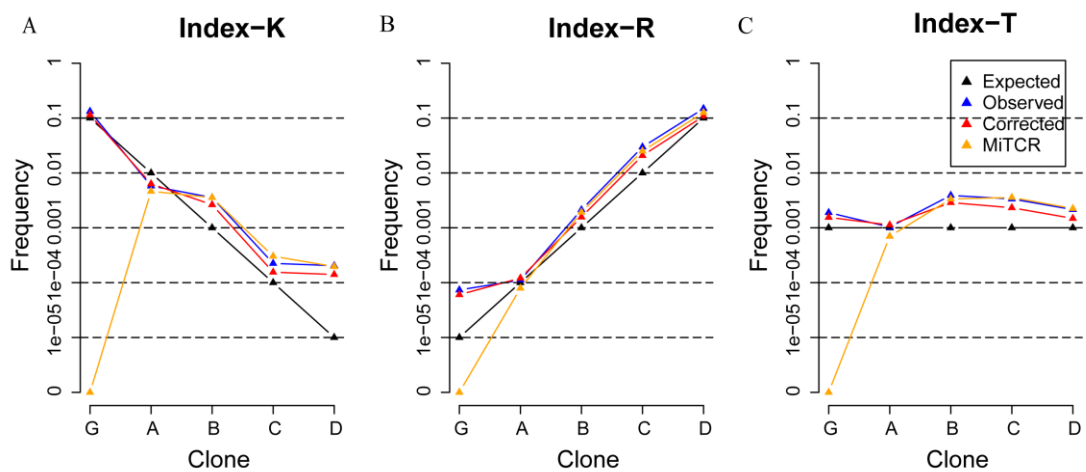

**Figure S7. MiTCR and IMonitor performance in 3 spiked-in samples.**

Supplement: figures7.pdf [file figures7.pdf]
